# Supplementary material
Source: publisher figshare collection journal article supplement (https://karger.figshare.com/ndownloader/files/22643222)
Supplement: Supplementary file 1 [file 22643222]

Suppl. Video. 1. Agitated saline was injected from both upper arms. Transthoracic apical four-chamber view with agitated saline contrast imaging. Imaging reveals a large contrast passage to the left atrium and left ventricle through pulmonary veins. No clear evidence of contrast passage to the right side of the heart.
